# Supplementary material
Source: PubMed Central journal article supplement (PMC4524794)
Supplement: NIHMS661004-supplement-394_2015_841_MOESM1_ESM.pdf [file NIHMS661004-supplement-394_2015_841_MOESM1_ESM.pdf]

**Supplemental Table 1.** Effect of the study diets and weight loss on fasting plasma leptin and adiponectin, and biomarkers of low-grade chronic systemic inflammation\*.

|                                    |                             | n  | Visit A<br>(Baseline) | Visit D<br>(6 weeks) | RM-ANOVA p-values |                         |                            |
|------------------------------------|-----------------------------|----|-----------------------|----------------------|-------------------|-------------------------|----------------------------|
|                                    |                             |    |                       |                      | Time              | Time x<br>diet<br>group | Time x<br>weight<br>change |
| Leptin (ng/mL)                     | Eucaloric moderate-fat diet | 30 | 4.7 (0.4-25.7)        | 4.2 (0.2-29.1)       | 0.141             | 0.675                   | <0.001                     |
|                                    | Eucaloric low-fat diet      | 31 | 4.7 (0.2-25.7)        | 4.6 (0.2-23.7)       |                   |                         |                            |
|                                    | Low-calorie low-fat diet    | 31 | 7.3 (0.2-35.2)        | 3.7 (0.2-23.4)       |                   |                         |                            |
| C-reactive protein<br>(mg/L)       | Eucaloric moderate-fat diet | 30 | 0.63 (0.08-4.46)      | 0.66 (0.09-4.38)     | 0.975             | 0.186                   | 0.060                      |
|                                    | Eucaloric low-fat diet      | 31 | 0.64 (0.10-5.56)      | 0.55 (0.12-5.89)     |                   |                         |                            |
|                                    | Low-calorie low-fat diet    | 31 | 0.98 (0.18-5.82)      | 0.68 (0.08-7.14)     |                   |                         |                            |
| Interleukin-6<br>(pg/mL)           | Eucaloric moderate-fat diet | 30 | 1.02 (0.29-9.39)      | 1.02 (0.20-10.79)    | 0.719             | 0.764                   | 0.227                      |
|                                    | Eucaloric low-fat diet      | 31 | 0.78 (0.31-5.57)      | 0.77 (0.39-6.32)     |                   |                         |                            |
|                                    | Low-calorie low-fat diet    | 31 | 1.15 (0.45-4.65)      | 1.01 (0.30-5.82)     |                   |                         |                            |
| Total adiponectin<br>(ng/mL)       | Eucaloric moderate-fat diet | 30 | 5,913 ± 2,232         | 5,557 ± 2,329        | <0.001            | 0.021                   | 0.051                      |
|                                    | Eucaloric low-fat diet      | 31 | 6,337 ± 2,675         | 5,448 ± 2,388        |                   |                         |                            |
|                                    | Low-calorie low-fat diet    | 31 | 6,077 ± 2,307         | 5,336 ± 1,764        |                   |                         |                            |
| Soluble TNF<br>receptor I (pg/mL)  | Eucaloric moderate-fat diet | 30 | 1,117 ± 266           | 1,130 ± 267          | 0.842             | 0.602                   | 0.858                      |
|                                    | Eucaloric low-fat diet      | 31 | 1,129 ± 298           | 1,102 ± 299          |                   |                         |                            |
|                                    | Low-calorie low-fat diet    | 31 | 1,084 ± 277           | 1,073 ± 264          |                   |                         |                            |
| Soluble TNF<br>receptor II (pg/mL) | Eucaloric moderate-fat diet | 30 | 5,153 ± 1,296         | 5,112 ± 1,202        | 0.420             | 0.982                   | 0.437                      |
|                                    | Eucaloric low-fat diet      | 31 | 5,237 ± 1,337         | 5,163 ± 1,354        |                   |                         |                            |
|                                    | Low-calorie low-fat diet    | 31 | 4,962 ± 845           | 5,017 ± 934          |                   |                         |                            |

\* Data are means ± SD or median (range). Abbreviations: RM-ANOVA: repeated measures analysis of variance, TNF: tumor necrosis factor.

A low-fat high-carbohydrate diet reduces plasma total adiponectin concentrations compared to a moderate-fat diet with no impact on biomarkers of systemic inflammation in a randomized controlled feeding study

European Journal of Nutrition

Xiaoling Song\*, Mark Kestin, Yvonne Schwarz, Pamela Yang, Xiaojun Hu, Johanna W. Lampe, Mario Kratz

Division of Public Health Sciences, Fred Hutchinson Cancer Research Center; E-Mail: xsong2@fredhutch.org
