# Supplementary material
Source: PubMed Central journal article supplement (PMC4524794)
Supplement: NIHMS661004-supplement-394_2015_841_MOESM2_ESM.pdf [file NIHMS661004-supplement-394_2015_841_MOESM2_ESM.pdf]

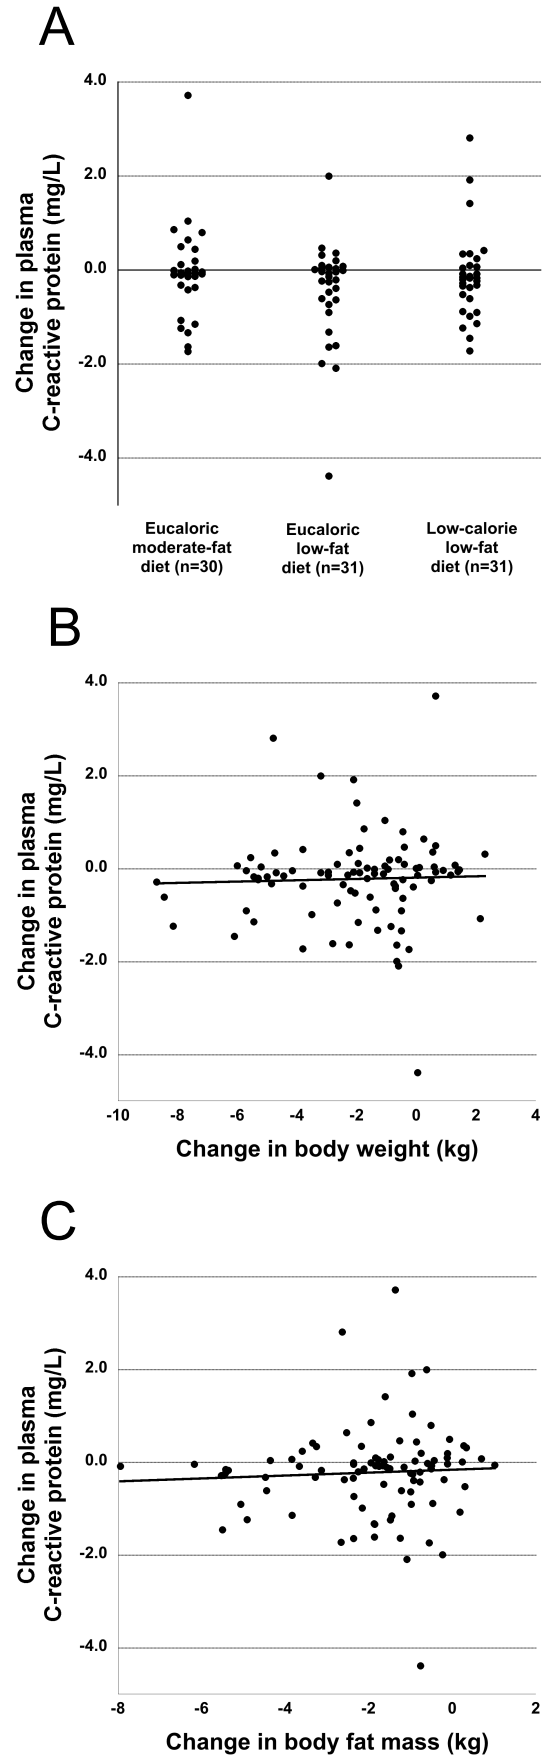

Supplemental Figure 1. Change in CRP over the 6-week dietary period

A low-fat high-carbohydrate diet reduces plasma total adiponectin concentrations compared to a moderate-fat diet with no impact on biomarkers of systemic inflammation in a randomized controlled feeding study

European Journal of Nutrition

Xiaoling Song\*, Mark Kestin, Yvonne Schwarz, Pamela Yang, Xiaojun Hu, Johanna W. Lampe, Mario Kratz

Division of Public Health Sciences, Fred Hutchinson Cancer Research Center

E-Mail: [xsong2@fredhutch.org](mailto:xsong2@fredhutch.org)
